# Supplementary material for: Colorimetric response to mercury-induced abstraction of triethylene glycol ligands from a gold nanoparticle surface
Source: Royal Society of Chemistry journal article supplement (doi:10.1039/b808433e), 2008-01-01
Supplement: b808433e.pdf [file b808433e.pdf]

Electronic Supplementary Information  
for  
**Colorimetric Response to Mercury-induced Abstraction of  
Triethylene Glycol Ligand from Gold Nanoparticle Surface**

**Tasuku Hirayama,<sup>†</sup> Masayasu Taki,<sup>\*,†,‡</sup> Yukiyasu Kashiwagi,<sup>§</sup> Masami Nakamoto,<sup>§</sup>  
Atsushi Kunishita,<sup>||</sup> Shinobu Itoh,<sup>||</sup> and Yukio Yamamoto<sup>†</sup>**

<sup>†</sup> Graduate School of Human & Environmental Studies

<sup>‡</sup> Graduate School of Global Environmental Studies

Kyoto University, Yoshida, Sakyo-ku, Kyoto 606-8501, Japan.

<sup>§</sup> Osaka Municipal Technical Research Institute, 1-6-50 Morinomiya, Joto-ku, Osaka, 536-8553, Japan

<sup>||</sup> Graduate School of Science, Osaka City University, 3-3-138 Sugimoto, Sumiyoshi-ku, Osaka, 558-8585, Japan

\* To whom correspondence should be addressed

Phone: +81-75-753-7871 / fax: +81-75-753-6833

Email address: taki@chem.mbox.media.kyoto-u.ac.jp

## Contents

1. Synthesis
2. UV-vis Absorption Spectroscopy
3. Electrospray Ionization Mass Spectroscopy (ESI-MS)
4. Transmission Electron Microscopy (TEM)
5. References

Figure S1. UV-vis spectra of Au:S-EG<sub>n</sub> (n = 2, 3, and 4) before and after the reaction with Hg<sup>2+</sup>.

Figure S2. ESI-MS of the reaction products between Au:S-EG<sub>3</sub> and Hg<sup>2+</sup>.

## 1. Synthesis

**General.** All chemicals used in this study were commercial products of the highest available purity and were further purified by the standard methods, if necessary.<sup>1</sup> <sup>1</sup>H-NMR spectra were recorded with a JEOL JNM-EX-270 (270 MHz) or a JEOL alpha-500 (500 MHz) using TMS as the internal standard. TLC analyses were carried out by using Silica gel 60 F<sub>254</sub> (Merck). Flash chromatography was performed on silica gel (Merck Silica Gel 60).

### EG<sub>n</sub>-SH (*n* = 2, 3, and 4)

**Scheme S1.** Synthesis of EG<sub>n</sub>-SH.

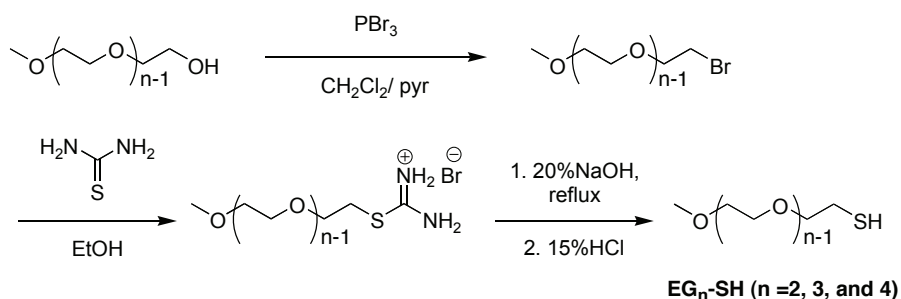

Ethyleneglycol ligands were synthesized by reported procedure.<sup>2,3</sup> In brief, synthesis of EG<sub>3</sub>-SH is described here as typical example. To a ice-cooled solution of tri(ethyleneglycol) monomethyl ether (10 g, 61 mmol) and pyridine (3.5 mL) in CH<sub>2</sub>Cl<sub>2</sub> (40 mL) was added dropwise PBr<sub>3</sub> (16 g, 61 mmol) in CH<sub>2</sub>Cl<sub>2</sub> with stirring over 30 minutes. The reaction mixture immediately turned cloudy and the resulting suspension was stirred overnight. After reaction, the mixture was washed with 10% aqueous sodium carbonate (50 mL), 5% sulfuric acid (50 mL), water (50 mL × 2), and brine (40 mL). The organic phase was dried over MgSO<sub>4</sub>, and the solvent was evaporated to obtain CH<sub>3</sub>O(CH<sub>2</sub>CH<sub>2</sub>O)<sub>2</sub>CH<sub>2</sub>CH<sub>2</sub>Br (7.39 g, 32.6 mmol, 54%). The crude product was used without further purification.

A solution of 1-bromo-2-[2-(2-methoxyethoxy)ethoxy]ethane (7.39 g, 32.6 mmol) and thiourea (5.0 g, 65.2 mmol) in ethanol (50 mL) was stirred for 5 h, and then the solvent was evaporated. To the resultant gum, 20% NaOH<sub>aq</sub> (40 mL) was added, and the mixture was refluxed for 3 h. After cooling to room temperature, pH of the resultant mixture was adjusted to ≈ 2 by addition of 6 M HCl<sub>aq</sub>. The aqueous solution was extracted by ether (50 mL × 3), and the organic phase was washed by water (30 mL × 2). After dried over MgSO<sub>4</sub>, the solvent was evaporated. The crude product was distilled under

reduced pressure (62-64 °C, 1.2 mmHg) to obtain EG<sub>3</sub>-SH (1.4 g, 24%). <sup>1</sup>H-NMR (270 MHz, CDCl<sub>3</sub>): δ 1.59 (1 H, t, *J* = 8.1 Hz), 2.72 (2 H, dt, *J* = 8.1 and 6.3 Hz), 3.38 (3 H, s), 3.53-3.67 (10 H, m).

EG<sub>2</sub>SH: Synthesis was started with 1-bromo-2-(2-methoxyethoxy)ethane, and purification was done by distillation at 40-42 °C under 1.2 mmHg pressure. Yield: 2.71 g, 60%. <sup>1</sup>H NMR (270 MHz, CDCl<sub>3</sub>): δ 1.58 (1 H, t, *J* = 8.1 Hz), 2.71 (2 H, dt, *J* = 8.1 and 6.3 Hz), 3.39 (3 H, s), 3.54-3.65 (10 H, m).

EG<sub>4</sub>SH: Synthesis was started with tetra(ethyleneglycol)monomethyl ether, and purification was done by silica gel column chromatography (AcOEt : Hexane = 1:1). Yield: 565 mg, 17%. <sup>1</sup>H-NMR (270 MHz, CDCl<sub>3</sub>): δ 1.60 (1 H, t, *J* = 8.1 Hz), 2.70 (2 H, dt, *J* = 8.1 and 6.3 Hz), 3.38 (3 H, s), 3.53-3.73 (14 H, m).

#### ***Au:S-EG<sub>n</sub> (n = 2, 3, and 4)***

Au:S-EG<sub>n</sub> were synthesized by modified previous procedure.<sup>2</sup> To a solution of HAuCl<sub>4</sub>•4H<sub>2</sub>O (200 mg, 0.49 mmol) in pre-mixed MeOH-AcOH (6:1, 35 mL), 0.5 eq of EG<sub>n</sub>-SH (0.25 mmol) was added. An aqueous solution (5 mL) of NaBH<sub>4</sub> (186 mg, 6.1 mmol) was added dropwise to the mixture, and immediately the color turned from yellow to brown. After rapid stirring for 2 h, the solvent was evaporated below 45 °C. Ethanol was added, and the mixture was filtered through a membrane filter (pore size = 0.1 μm) to remove an insoluble salt. After evaporation, the residue was re-suspended in MilliQ water and purified by size-exclusion chromatography (Sephadex G-25). The collected fraction was then lyophilized for 3 days to obtain pure Au:S-EG<sub>n</sub> as a dark purple powder.

## **2. UV-vis Absorption Spectroscopy**

The UV absorption spectra of Au:S-EG<sub>n</sub> (n = 2, 3, and 4) were recorded on a Hewlett-Packard 8453 spectrometer. The path length was 1 cm with a cell volume of 3.0 mL. Au:S-EG<sub>n</sub> (n = 2, 3, and 4) was dissolved in a 10 mM HEPES buffer (pH 7.20) to give the final concentration of 50 μg mL<sup>-1</sup>. 15 μL of Hg<sup>2+</sup> stock solution (0.1 M) in water was added to the 3 mL of Au:S-EG<sub>n</sub> solutions (final Hg<sup>2+</sup> conc. = 500 μM), and the solutions were incubated under ambient conditions for 1 h and measured. Time course measurements of Au:S-EG<sub>n</sub> were carried out under the same condition as described above. While the measurement, the solution was kept stirring. The absorbance at 580 nm was recorded at every 60 seconds.

### 3. Electrospray Ionization Mass Spectroscopy (ESI-MS)

ESI-mass measurement was performed on PE SCIEX API 150EX. 0.1 mg mL<sup>-1</sup> Au:S-EG<sub>3</sub> was incubated with 0.5 mM Hg<sup>2+</sup> in water for 1 h. As the color changed to blue, the resultant was applied to an ultrafiltration with a filter of 10 kDa MWCO. The filtrate was diluted with methanol (1:10) prior to ESI-mass measurement. Control experiments were performed under the same procedures except Hg<sup>2+</sup>-addition.

### 4. Transmission Electron Microscopy (TEM)

TEM images were obtained with JEOL JEM-2100 by operating at 100 kV. 0.1 mg mL<sup>-1</sup> Au:S-EG<sub>3</sub> in water was prepared, and a 5 μL drop of the solution was placed on a carbon-coated Cu grid (JEOL). The Au:S-EG<sub>3</sub> solution was then incubated with 0.5 mM Hg<sup>2+</sup> for 1 h, and then placed on the grid.

### 5. References

1. W. L. F. Armarego and C. L. L. Chai, *Purification of Laboratory Chemicals*, 5th ed.; Butterworth-Heinemann: Boston, 2003.
2. M. Zheng, F. Davidson and X. Y. Huang, *J. Am. Chem. Soc.*, 2003, **125**, 7790; M. Zheng, Z. G. Li and X. Y. Huang, *Langmuir*, 2004, **20**, 4226.

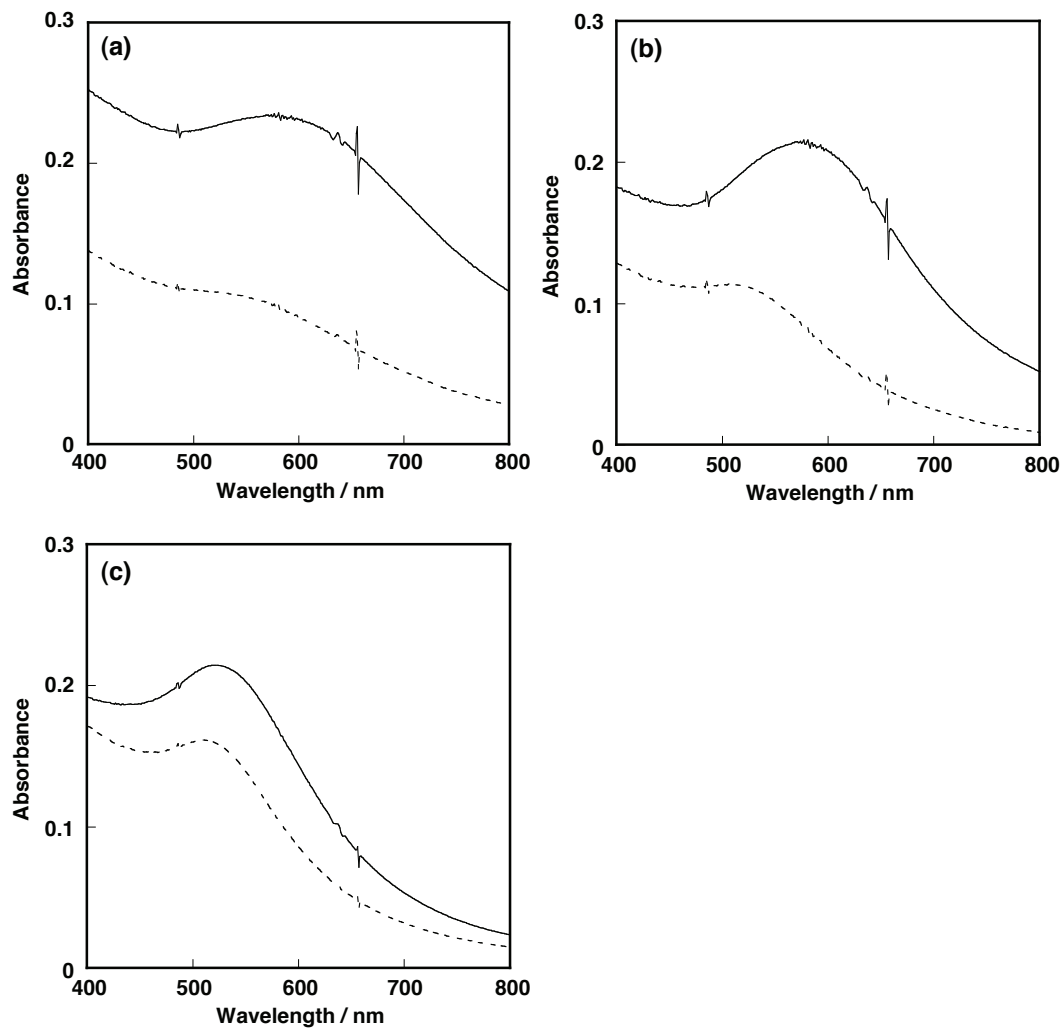

**Figure S1.** UV-vis spectra of (a) Au:S-EG<sub>2</sub>, (b) Au:S-EG<sub>3</sub>, and (c) Au:S-EG<sub>4</sub> in the absence (dashed line) and presence of  $Hg^{2+}$  (solid line) in 10 mM HEPES (pH 7.20). The spectra were measured after 1 h addition of 500  $\mu M$   $Hg^{2+}$  to the solution of Au:S-EG<sub>n</sub> ( $n = 2, 3,$  and 4).

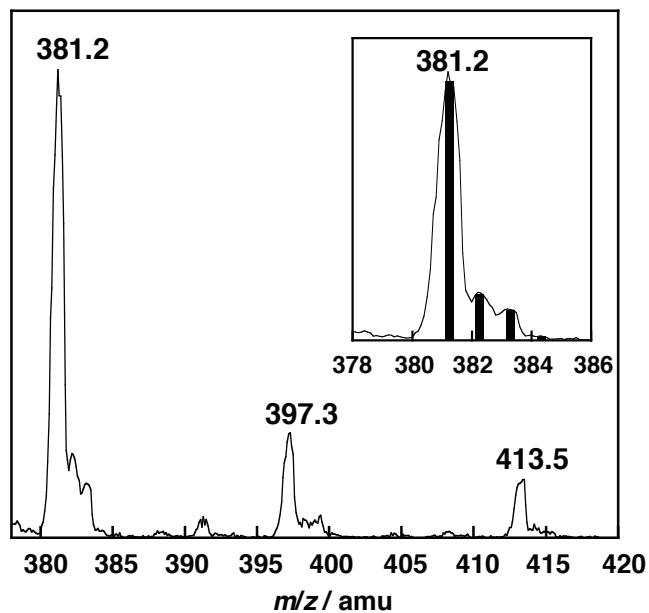

**Figure S2.** ESI-MS (pos.) of the reaction products between Au:S-EG<sub>3</sub> and Hg<sup>2+</sup>. The sample was separated from the reaction mixture through an ultrafiltration (10 kDa MWCO). The calculated isotope pattern for [EG<sub>3</sub>-S-S-EG<sub>3</sub> + Na]<sup>+</sup> is shown in the inset as black bars.
